# Supplementary material
Source: publisher figshare collection journal article supplement (https://asha.figshare.com/articles/dataset/_/5150122)
Supplement: Supplementary file 1 [file 1]

### Supplemental Material S3. Exclusionary criteria for title, abstract, and full-text level evaluation.

| Title criteria     | Operationalization                                                                                                              |
|--------------------|---------------------------------------------------------------------------------------------------------------------------------|
| 2                  | Refers exclusively to a disorder other than SLI                                                                                 |
| 3                  | Refers to specific genes, alleles, genetic loci, or methodology used to obtain genetic data                                     |
| 3                  | Refers to neuroanatomical structures, neurophysiological measures, or methodology used to image neuroanatomy or neurophysiology |
| Abstract criteria  | Operationalization                                                                                                              |
| 2                  | Refers exclusively to a disorder other than SLI                                                                                 |
| 3                  | Refers to specific genes, alleles, genetic loci, or methodology used to obtain genetic data                                     |
| 3                  | Refers to neuroanatomical structures, neurophysiological measures, or methodology used to image neuroanatomy or neurophysiology |
| 3                  | Refers to intervention as the independent variable                                                                              |
| Full-text criteria | Operationalization                                                                                                              |
| 1                  | Uses a two-gate recruitment approach                                                                                            |
| 1                  | Selectively recruits from a population known to be at risk for SLI                                                              |
| 2                  | Does not include one group consisting exclusively of individuals diagnosed with SLI                                             |
| 2                  | Includes participants with SLI diagnosed before the age of four years                                                           |
| 3                  | Does not examine one or more case history risk factors that could be identified before the age of three years                   |
| 4                  | Does not include one group consisting exclusively of individuals with typical language development                              |
| 4                  | Does not provide odds ratio values or enough data to calculate odds ratio values for included risk factors                      |

*Note.* Criterion 1 = epidemiological sample; Criterion 2 = specific language impairment; Criterion 3 = case history risk factors; Criterion 4 = odds ratios.
