# Supplementary material
Source: publisher figshare collection journal article supplement (https://asha.figshare.com/articles/dataset/_/5150122)
Supplement: Supplementary file 2 [file 1]

## Supplemental Material S1. Details of database searches.

| Search    | String                                                                                                                                                                                                                                                                                                                                                                                                                                                                                                                                                                                                                                                                      | Databases                                                                                                          | Scope                                                                                                    |
|-----------|-----------------------------------------------------------------------------------------------------------------------------------------------------------------------------------------------------------------------------------------------------------------------------------------------------------------------------------------------------------------------------------------------------------------------------------------------------------------------------------------------------------------------------------------------------------------------------------------------------------------------------------------------------------------------------|--------------------------------------------------------------------------------------------------------------------|----------------------------------------------------------------------------------------------------------|
| Initial   | <i>specific language impairment OR developmental language disorder OR developmental aphasia OR developmental dysphasia OR developmental language delay OR developmental language impairment OR specific language disorder AND risk factors</i>                                                                                                                                                                                                                                                                                                                                                                                                                              | Campbell Collaboration<br>Cochrane Library<br>EBSCOhost: CINAHL,<br>ERIC, MEDLINE,<br>PsycINFO<br>PubMed<br>Scopus | [All Text]<br>[Title-Abstract-Key Words]<br>[All Text]<br><br>[All Fields]<br>[Title-Abstract-Key Words] |
| Follow-up | <i>specific language impairment OR developmental language disorder OR developmental aphasia OR developmental dysphasia OR developmental language delay OR developmental language impairment OR specific language disorder AND birth order OR birth weight OR breastfeeding OR congenital abnormality OR family history OR maternal age OR maternal education OR paternal education OR maternal illness OR maternal mental health OR maternal vocabulary OR minority OR multiple birth OR multilingual exposure OR newborn condition OR marital status OR parenting behavior OR perinatal OR pregnancy condition OR premature OR prenatal OR sex OR socioeconomic status</i> | Campbell Collaboration<br>Cochrane Library<br>EBSCOhost: CINAHL,<br>ERIC, MEDLINE,<br>PsycINFO<br>PubMed<br>Scopus | [All Text]<br>[Title-Abstract-Key Words]<br>[All Text]<br><br>[All Fields]<br>[Title-Abstract-Key Words] |
