# Supplementary material
Source: publisher figshare collection journal article supplement (https://asha.figshare.com/articles/dataset/_/5150122)
Supplement: Supplementary file 3 [file 1]

# **Supplemental Material S4.** Risk factor information and effect size data extracted from each study.

| Study                                             | Risk factor            | Variables/specifications                   | Type        | Reference       | Adjusted | OR   | 95% CI    |
|---------------------------------------------------|------------------------|--------------------------------------------|-------------|-----------------|----------|------|-----------|
| Hammer et al. (2001)                              | Maternal education*    | Years                                      | Continuous  |                 | No       | 1.25 | 1.14–1.37 |
|                                                   | Minority status        | African American                           | Dichotomous | White           | No       | 2.68 | 1.52–4.72 |
|                                                   |                        | Hispanic                                   | Dichotomous | White           | No       | 0.71 | 0.16–3.09 |
|                                                   | Parenting behavior     | Read to child 1–5x/week                    | Categorical | Everyday        | No       | 1.68 | 1.19–2.35 |
|                                                   |                        | Read to child $\leq$ 1–3x/month            | Categorical | Everyday        | No       | 2.72 | 1.43–5.18 |
|                                                   |                        | Tell stories to child 1–5x/week            | Categorical | Everyday        | No       | 1.02 | 0.68–1.53 |
|                                                   |                        | Tell stories to child $\leq$ 1–3x/month    | Categorical | Everyday        | No       | 1.64 | 1.08–2.49 |
|                                                   |                        | Discuss daily activities 1–5x/week         | Categorical | Everyday        | No       | 0.95 | 0.65–1.39 |
|                                                   |                        | Discuss daily activities $\leq$ 1–3x/month | Categorical | Everyday        | No       | 4.31 | 2.42–7.68 |
|                                                   |                        | Routine wake time                          | Dichotomous | Everyday        | No       | 1.43 | 0.96–2.14 |
|                                                   |                        | Family meal $\leq$ 1–5 x/week              | Dichotomous | Everyday        | No       | 1.87 | 0.07–5.19 |
|                                                   | Socioeconomic status*  | Income-to-poverty                          | Continuous  |                 | No       | 1.49 | 1.27–1.75 |
|                                                   |                        | Per capita income                          | Continuous  |                 | No       | 1.00 | 1.00–1.00 |
|                                                   |                        | Neighborhood income-to-poverty             | Continuous  |                 | No       | 4.00 | 1.85–8.33 |
| Merricks et al. (2004)                            | Biological sex         | Male                                       | Dichotomous |                 | No       | 1.02 | 0.42–2.49 |
| Reilly et al. (2010)<br><i>Receptive subgroup</i> | Birth order            | 2nd                                        | Categorical | 1st             | Yes      | 1.01 | 0.63–1.61 |
|                                                   |                        | 3rd                                        | Categorical | 1st             | Yes      | 1.88 | 1.04–3.37 |
|                                                   |                        | 4th                                        | Categorical | 1st             | Yes      | 1.30 | 0.36–4.75 |
|                                                   | Birth weight*          |                                            | Continuous  |                 | Yes      | 1.22 | 0.79–1.89 |
|                                                   | Family history         |                                            | Dichotomous |                 | Yes      | 1.88 | 1.23–2.85 |
|                                                   | Maternal age*          |                                            | Continuous  |                 | Yes      | 1.03 | 0.98–1.09 |
|                                                   | Maternal education*    | 13 years                                   | Categorical | $\leq$ 12 years | Yes      | 1.05 | 0.65–1.69 |
|                                                   |                        | Degree/postgraduate degree                 | Categorical | $\leq$ 12 years | Yes      | 1.96 | 1.10–3.57 |
|                                                   | Maternal mental health |                                            | Dichotomous |                 | Yes      | 0.90 | 0.58–1.38 |
|                                                   | Maternal vocabulary*   |                                            | Continuous  |                 | Yes      | 1.09 | 1.03–1.14 |
|                                                   | Multiple birth         |                                            | Dichotomous |                 | Yes      | 1.34 | 0.36–4.98 |
|                                                   | Prematurity            | < 36 weeks                                 | Dichotomous | $\geq$ 36 weeks | Yes      | 0.98 | 0.32–3.03 |
|                                                   | Biological sex         | Male                                       | Dichotomous | Female          | Yes      | 2.20 | 1.46–3.32 |

|                                                    |                        |                                        |             |             |     |      |           |
|----------------------------------------------------|------------------------|----------------------------------------|-------------|-------------|-----|------|-----------|
| Reilly et al. (2010)<br><i>Expressive subgroup</i> | Socioeconomic status*  | SEIFA                                  | Continuous  |             | Yes | 1.43 | 1.03–1.96 |
|                                                    | Birth order            | 2nd                                    | Categorical | 1st         | Yes | 1.29 | 0.75–2.21 |
|                                                    |                        | 3rd                                    | Categorical | 1st         | Yes | 2.00 | 1.01–3.96 |
|                                                    |                        | 4th                                    | Categorical | 1st         | Yes | 1.66 | 0.43–6.34 |
|                                                    | Birth weight*          |                                        | Continuous  |             | Yes | 1.61 | 0.98–2.70 |
|                                                    | Family history         |                                        | Dichotomous |             | Yes | 1.69 | 1.05–2.73 |
|                                                    | Maternal age*          |                                        | Continuous  |             | Yes | 1.02 | 0.97–1.09 |
|                                                    | Maternal education*    | 13 years                               | Categorical | ≤ 12 years  | Yes | 2.00 | 1.19–3.33 |
|                                                    |                        | Degree/postgraduate degree             | Categorical | ≤ 12 years  | Yes | 3.85 | 1.96–7.14 |
|                                                    | Maternal mental health |                                        | Dichotomous |             | Yes | 0.77 | 0.46–1.29 |
|                                                    | Maternal vocabulary*   |                                        | Continuous  |             | Yes | 1.04 | 0.98–1.10 |
|                                                    | Prematurity            | < 36 weeks                             | Dichotomous |             | Yes | 0.65 | 0.16–2.64 |
|                                                    | Biological sex         | Male                                   | Dichotomous |             | Yes | 1.43 | 0.90–2.28 |
|                                                    | Socioeconomic status*  | SEIFA                                  | Continuous  |             | Yes | 1.54 | 1.09–2.22 |
| Stanton-Chapman et al.<br>(2002)                   | Birth order            | 3rd or 4th                             | Categorical | 1st or 2nd  | No  | 1.40 | 1.30–1.40 |
|                                                    |                        | 5th or more                            | Categorical | 1st or 2nd  | No  | 1.70 | 1.60–1.90 |
|                                                    | Birth weight           | < 1500 g                               | Categorical | ≥ 2500g     | No  | 2.80 | 2.40–3.40 |
|                                                    |                        | 1500–2499 g                            | Categorical | ≥ 2500g     | No  | 1.60 | 1.40–1.70 |
|                                                    | Congenital abnormality | Spina bifida, heart malformation, etc. | Dichotomous |             | No  | 1.40 | 1.10–1.70 |
|                                                    | Maternal age           | < 18 years                             | Dichotomous | 18–35 years | No  | 1.60 | 1.50–1.80 |
|                                                    | Maternal education     | < 12 years                             | Categorical | > 12 years  | No  | 2.10 | 1.90–2.20 |
|                                                    |                        | 12 years                               | Categorical | > 12 years  | No  | 1.40 | 1.00–1.50 |
|                                                    | Multilingual exposure* | Spanish                                | Categorical | English     | No  | 1.56 | 1.41–1.72 |
|                                                    |                        | Other                                  | Categorical | English     | No  | 1.59 | 1.28–1.96 |
|                                                    | Newborn condition      | 5-min Apgar 0–3                        | Categorical | 7–10        | No  | 2.50 | 1.60–4.10 |
|                                                    |                        | 5-min Apgar 4–6                        | Categorical | 7–10        | No  | 1.90 | 1.50–2.40 |
|                                                    |                        | Anemia, assisted ventilation, etc.     | Dichotomous |             | No  | 1.40 | 1.10–1.70 |
|                                                    | Parent marital status  | Unmarried                              | Dichotomous | Married     | No  | 1.80 | 1.70–1.80 |
|                                                    | Perinatal event        | Birth complications                    | Dichotomous |             | No  | 1.10 | 1.10–1.20 |
|                                                    | Pregnancy condition    | Anemia, diabetes, preeclampsia, etc.   | Dichotomous |             | No  | 1.20 | 1.20–1.30 |
|                                                    | Prematurity            | < 37 weeks                             | Dichotomous | 37–42 weeks | No  | 1.50 | 1.30–1.60 |

|                                 |                              |                                   |             |               |     |      |           |
|---------------------------------|------------------------------|-----------------------------------|-------------|---------------|-----|------|-----------|
|                                 | Prenatal care                | 2nd trimester                     | Categorical | 1st trimester | No  | 1.50 | 1.40–1.60 |
|                                 |                              | 3rd trimester/none                | Categorical | 1st trimester | No  | 1.80 | 1.70–2.00 |
|                                 | Prenatal exposure            | Maternal tobacco use              | Dichotomous |               | Yes | 1.20 | 1.10–1.20 |
|                                 |                              | Maternal alcohol use              | Dichotomous |               | Yes | 1.20 | 1.10–1.40 |
| Tomblin, Records, et al. (1997) | Biological sex               | Male                              | Dichotomous |               | No  | 1.64 | 1.56–1.73 |
|                                 | Biological sex               | Male                              | Dichotomous |               | No  | 1.42 | 1.07–1.89 |
| Tomblin, Smith, et al. (1997b)  | Birth weight                 | ≤ 2500g                           | Dichotomous |               | Yes | 1.70 | 0.80–3.80 |
|                                 | Breastfed*                   |                                   | Dichotomous |               | Yes | 2.00 | 1.43–2.50 |
| Family history                  | Maternal speech problem (SP) | Maternal speech problem (SP)      | Dichotomous |               | No  | 0.80 | 0.43–1.50 |
|                                 |                              | Maternal mental retardation (MR)  | Dichotomous |               | No  | 1.50 | 0.60–3.80 |
|                                 |                              | Maternal learning disability (LD) | Dichotomous |               | No  | 1.60 | 0.87–2.00 |
|                                 |                              | Maternal SP, MR, or LD            | Dichotomous |               | No  | 1.30 | 0.81–2.00 |
|                                 |                              | Paternal speech problem (SP)      | Dichotomous |               | No  | 1.90 | 1.10–3.30 |
|                                 |                              | Paternal mental retardation (MR)  | Dichotomous |               | No  | 3.90 | 1.90–8.10 |
|                                 |                              | Paternal learning disability (LD) | Dichotomous |               | No  | 1.80 | 1.00–3.30 |
|                                 |                              | Paternal SP, MR, or LD            | Dichotomous |               | No  | 2.10 | 1.30–3.10 |
|                                 |                              |                                   |             |               |     |      |           |
| Maternal education              | Incomplete high school       | Incomplete high school            | Categorical | College grad  | No  | 3.50 | 1.80–6.50 |
|                                 |                              | Complete high school              | Categorical | College grad  | No  | 2.30 | 1.60–3.90 |
|                                 |                              | Incomplete college                | Categorical | College grad  | No  | 1.70 | 1.10–2.80 |
| Paternal education              | Incomplete high school       | Incomplete high school            | Categorical | College grad  | No  | 3.20 | 1.80–5.50 |
|                                 |                              | Complete high school              | Categorical | College grad  | No  | 2.40 | 1.60–3.80 |
|                                 |                              | Incomplete college                | Categorical | College grad  | No  | 1.80 | 1.10–3.00 |
| Maternal illness                | Kidney infection             | Kidney infection                  | Dichotomous |               | No  | 0.60 | 0.20–1.60 |
|                                 |                              | Thyroid issue                     | Dichotomous |               | No  | 1.40 | 0.40–5.20 |
|                                 |                              | Sexually transmitted disease      | Dichotomous |               | No  | 1.20 | 0.70–2.00 |
|                                 |                              | Urinary tract infection           | Dichotomous |               | No  | 1.20 | 0.70–2.00 |
| Perinatal event                 | Cesarean section             | Cesarean section                  | Dichotomous |               | Yes | 0.70 | 0.50–1.10 |
|                                 |                              | Forceps delivery                  | Dichotomous |               | Yes | 0.50 | 0.30–1.00 |
|                                 |                              | Labor duration < 2 hours          | Categorical | 2–12 hours    | Yes | 1.60 | 0.90–2.80 |
|                                 |                              | Labor duration 12–24 hours        | Categorical | 2–12 hours    | Yes | 1.10 | 0.70–1.80 |

|                          |                       |                                    |             |            |     |      |           |
|--------------------------|-----------------------|------------------------------------|-------------|------------|-----|------|-----------|
| Tomblin et al. (1998)    | Pregnancy condition   | Labor duration > 24 hours          | Categorical | 2–12 hours | Yes | 1.10 | 0.50–2.40 |
|                          |                       | Induced labor                      | Dichotomous |            | Yes | 1.00 | 0.60–1.50 |
|                          |                       | Birth complications                | Dichotomous |            | Yes | 0.80 | 0.60–1.20 |
|                          |                       | History of poor pregnancy outcomes | Dichotomous |            | No  | 1.10 | 0.50–1.60 |
|                          |                       | Gestational diabetes               | Dichotomous |            | No  | 1.00 | 0.50–2.20 |
|                          | Prenatal exposure     | Hypertension                       | Dichotomous |            | No  | 1.10 | 0.70–1.80 |
|                          |                       | Maternal smoking                   | Dichotomous |            | No  | 1.60 | 1.10–2.20 |
|                          |                       | Maternal illicit drug use          | Dichotomous |            | No  | 0.80 | 0.40–1.50 |
|                          |                       | Maternal alcohol use               | Dichotomous |            | No  | 1.00 | 0.70–1.40 |
|                          |                       | Paternal smoking                   | Dichotomous |            | No  | 1.90 | 1.40–2.60 |
|                          | Childhood exposure    | Paternal illicit drug use          | Dichotomous |            | No  | 1.30 | 0.90–2.90 |
|                          |                       | Paternal alcohol use               | Dichotomous |            | No  | 0.70 | 0.40–1.20 |
|                          |                       | Occupational exposure              | Dichotomous |            | No  | 0.90 | 0.60–1.40 |
|                          |                       | Maternal smoking                   | Dichotomous |            | No  | 1.70 | 1.20–2.30 |
|                          |                       | Paternal smoking                   | Dichotomous |            | No  | 1.80 | 1.30–2.50 |
|                          | Maternal age*         | One parent smoking                 | Categorical | No smoking | No  | 1.70 | 1.10–2.70 |
|                          |                       | Both parents smoking               | Categorical | No smoking | No  | 2.30 | 1.50–3.40 |
|                          |                       |                                    | Continuous  |            | No  | 1.05 | 1.01–1.09 |
|                          | Minority status       | African American                   | Dichotomous |            | No  | 2.70 | 1.50–4.70 |
|                          |                       | Hispanic                           | Dichotomous |            | No  | 0.70 | 0.20–3.10 |
|                          | Parent education*     | Average years (mother, father)     | Continuous  |            | No  | 1.32 | 1.20–1.46 |
|                          | Prenatal exposure     | Maternal alcohol use               | Dichotomous |            | No  | 0.90 | 0.60–1.30 |
|                          |                       | Maternal marijuana                 | Dichotomous |            | No  | 0.80 | 0.40–1.40 |
|                          |                       | Maternal cocaine                   | Dichotomous |            | No  | 1.00 | 0.30–2.90 |
|                          |                       | Maternal smoking, but quit         | Categorical | No smoking | No  | 1.60 | 0.90–2.50 |
|                          |                       | Maternal smoking throughout        | Categorical | No smoking | No  | 1.60 | 0.10–2.30 |
| Whitehouse et al. (2014) | Socioeconomic status* | Paternal smoking, but quit         | Categorical | No smoking | No  | 1.00 | 0.40–3.10 |
|                          |                       | Paternal smoking throughout        | Categorical | No smoking | No  | 1.90 | 1.40–2.70 |
|                          |                       | Income                             | Continuous  |            | No  | 1.22 | 1.11–1.35 |
|                          | Birth weight          | SGA                                | Dichotomous |            | No  | 1.52 | 0.65–3.55 |
|                          | Maternal age          | > 35 years                         | Dichotomous |            | No  | 1.13 | 0.34–3.79 |

|                       |                                 |             |    |      |            |
|-----------------------|---------------------------------|-------------|----|------|------------|
| Maternal education    | < 12 years                      | Dichotomous | No | 3.08 | 1.16–8.20  |
| Maternal illness      | Preexisting diabetes            | Dichotomous | No | 0.55 | 0.03–9.17  |
|                       | Kidney infection                | Dichotomous | No | 1.66 | 0.39–7.14  |
| Newborn condition     | Time to spontaneous respiration | Dichotomous | No | 1.64 | 0.71–3.81  |
|                       | Resuscitation                   | Dichotomous | No | 1.75 | 0.65–4.70  |
|                       | Birth trauma                    | Dichotomous | No | 0.97 | 0.23–4.12  |
|                       | 1-min Apgar < 7                 | Dichotomous | No | 1.63 | 0.73–3.61  |
|                       | 5-min Apgar < 8                 | Dichotomous | No | 2.17 | 0.81–5.82  |
|                       | NICU placement                  | Dichotomous | No | 2.20 | 0.95–5.11  |
|                       | Poor sucking/feeding            | Dichotomous | No | 2.33 | 0.54–10.10 |
|                       | Hypoglycemia                    | Dichotomous | No | 0.47 | 0.06–3.52  |
|                       | Jaundice                        | Dichotomous | No | 1.29 | 0.58–2.85  |
|                       | Anemia                          | Dichotomous | No | 5.10 | 0.65–40.29 |
|                       | Temperature maintenance         | Dichotomous | No | 2.52 | 0.15–43.45 |
| Parent marital status | Separated                       | Dichotomous | No | 0.64 | 0.15–2.71  |
| Perinatal event       | Breech                          | Dichotomous | No | 0.98 | 0.13–7.36  |
|                       | Induced labor                   | Dichotomous | No | 1.07 | 0.47–2.41  |
|                       | Maternal fever                  | Dichotomous | No | 1.30 | 0.30–5.59  |
|                       | Abnormal fetal heart rate       | Dichotomous | No | 1.02 | 0.44–2.35  |
|                       | Prostaglandins                  | Dichotomous | No | 0.73 | 0.10–5.47  |
|                       | Oxytocin                        | Dichotomous | No | 1.18 | 0.53–2.62  |
|                       | Narcotic analgesia              | Dichotomous | No | 0.90 | 0.41–2.00  |
|                       | Epidural analgesia              | Dichotomous | No | 1.08 | 0.50–2.35  |
|                       | Atypical placenta               | Dichotomous | No | 1.38 | 0.41–4.64  |
|                       | Atypical umbilical cord         | Dichotomous | No | 1.74 | 0.69–4.38  |
|                       | Elective cesarean section       | Dichotomous | No | 1.28 | 0.38–4.32  |
|                       | Emergency cesarean section      | Dichotomous | No | 0.87 | 0.20–3.70  |
|                       | Forceps/vacuum delivery         | Dichotomous | No | 0.40 | 0.10–1.72  |
|                       | Labor duration > 10 hours       | Dichotomous | No | 0.25 | 0.03–1.85  |
|                       | Expulsion > 120 min             | Dichotomous | No | 0.97 | 0.29–3.30  |
| Pregnancy condition   | Maternal BMI > 30               | Dichotomous | No | 0.26 | 0.02–4.26  |

|                      |                               |             |    |      |            |
|----------------------|-------------------------------|-------------|----|------|------------|
|                      | Hyperemesis                   | Dichotomous | No | 1.35 | 0.08–22.82 |
|                      | Gestational diabetes          | Dichotomous | No | 0.97 | 0.06–16.17 |
|                      | Threatened abortion           | Dichotomous | No | 2.19 | 0.65–7.43  |
|                      | Hemorrhage                    | Dichotomous | No | 1.10 | 0.26–4.69  |
|                      | Preeclampsia                  | Dichotomous | No | 1.13 | 0.07–19.03 |
|                      | Hospital admission < 20 weeks | Dichotomous | No | 1.22 | 0.16–9.18  |
|                      | Hospital admission ≥ 20 weeks | Dichotomous | No | 0.69 | 0.24–2.01  |
| Prenatal exposure    | Maternal alcohol use          | Dichotomous | No | 1.65 | 0.38–7.18  |
|                      | Maternal smoking              | Dichotomous | No | 1.39 | 0.57–3.38  |
| Biological sex       | Male                          | Dichotomous | No | 2.53 | 1.06–6.04  |
| Socioeconomic status | Below poverty                 | Dichotomous | No | 0.39 | 0.18–0.87  |

*Note.* OR = odds ratio; CI = confidence interval; SEIFA = Socio-Economic Indexes for Areas; SGA = small for gestational age; NICU = neonatal intensive care unit; BMI = body mass index.

\*Factor was weighted protectively; inverse OR was calculated to get risk value.

<sup>a</sup>Tomblin, Records, et al. (1997) used a two phase diagnostic process: (1) screening followed by (2) thorough diagnostic assessment. The screening sample included children with a variety of developmental disorders, whereas the diagnostic sample focused on children with SLI; thus, the diagnostic sample was used to calculate the OR for sex.

However, the ratio of males to females was not reported for the diagnostic sample. The male:female ratio for the diagnostic sample was assumed to be equivalent to the ratio for the full screening sample to perform this calculation.

## References

- Hammer, C. S., Tomblin, J. B., Zhang, X., & Weiss, A. L. (2001). Relationship between parenting behaviours and specific language impairment in children. *International Journal of Language & Communication Disorders*, 36, 185–205. <https://doi.org/10.1080/1368282001001991>
- Merricks, M. J., Stott, C. M., Goodyer, I. M., & Bolton, P. F. (2004). The aetiology of specific language impairment: No evidence of a role for obstetric complications. *Journal of Neural Transmission*, 111, 773–789. <https://doi.org/10.1007/s00702-003-0051-5>
- Reilly, S., Wake, M., Ukoumunne, O. C., Bavin, E., Prior, M., Cini, E., . . . Bretherton, L. (2010). Predicting language outcomes at 4 years of age: Findings from Early Language in Victoria Study. *Pediatrics*, 126(6), e1–e8. <https://doi.org/10.1542/peds.2010-0254>
- Stanton-Chapman, T. L., Chapman, D. A., Bainbridge, N. L., & Scott, K. G. (2002). Identification of early risk factors for language impairment. *Research in Developmental Disabilities*, 23, 390–405. [https://doi.org/10.1016/S0891-4222\(02\)00141-5](https://doi.org/10.1016/S0891-4222(02)00141-5)
- Tomblin, J. B., Hammer, C. S., & Zhang, X. (1998). The association of parental tobacco use and SLI. *International Journal of Language & Communication Disorders*, 33, 357–368. <https://doi.org/10.1080/136828298247686>
- Tomblin, J. B., Records, N. L., Buckwalter, P., Zhang, X., Smith, E., & O’Brien, M. (1997). Prevalence of specific language impairment in kindergarten children. *Journal of Speech, Language, and Hearing Research*, 40, 1245–1260. <https://doi.org/10.1044/jslhr.4006.1245>
- Tomblin, J. B., Smith, E., & Zhang, X. (1997). Epidemiology of specific language impairment: Prenatal and perinatal risk factors. *Journal of Communication Disorders*, 30, 325–344. [https://doi.org/10.1016/S0021-9924\(97\)00015-4](https://doi.org/10.1016/S0021-9924(97)00015-4)
- Whitehouse, A. J. O., Shelton, W. M. R., Ing, C., & Newnham, J. P. (2014). Prenatal, perinatal, and neonatal risk factors for specific language impairment: A prospective pregnancy cohort study. *Journal of Speech, Language, and Hearing Research*, 57, 1418–1427. [https://doi.org/10.1044/2014\\_JSLHR-L-13-0186](https://doi.org/10.1044/2014_JSLHR-L-13-0186)
