# Supplementary material
Source: publisher figshare collection journal article supplement (https://asha.figshare.com/articles/dataset/_/5150122)
Supplement: Supplementary file 4 [file 1]

## Supplemental Material S2. Terms used in automated filter during the title and abstract phases of the hand search.

| Citation level | Filter terms                  | Filtered in                              |
|----------------|-------------------------------|------------------------------------------|
| Title          | late talk*                    | late talker                              |
|                | late-talk*                    | late talking                             |
|                |                               | late-talker                              |
|                |                               | late-talking                             |
|                | language delay*               | developmental language delay             |
|                | language-delay*               | expressive language delay                |
|                |                               | specific expressive language delay       |
|                |                               | early language delay                     |
|                |                               | language delayed                         |
|                | language disorder*            | developmental language disorder          |
|                | language-disorder*            | specific developmental language disorder |
|                |                               | specific language disorder               |
|                |                               | primary language disorder                |
|                |                               | language disorders                       |
|                |                               | language disordered                      |
|                | language impair*              | language impairment                      |
|                | language-impair*              | specific language impairment             |
|                | SLI                           | specific expressive language impairment  |
|                |                               | expressive language impairment           |
|                |                               | receptive-expressive language impairment |
|                |                               | primary language impairment              |
|                |                               | developmental language impairment        |
|                |                               | oral language impairment                 |
|                |                               | severe language impairment               |
|                |                               | spoken language impairment               |
|                |                               | language impaired                        |
|                | language learning impair*     | language learning impairment             |
|                | language-learning impair*     | language learning impaired               |
|                | language/learning impair*     |                                          |
|                | language/learning-impair*     |                                          |
|                | language and learning impair* |                                          |
|                | aphasi*                       | congenital aphasia                       |
|                |                               | childhood aphasia                        |
|                |                               | developmental aphasia                    |
|                |                               | aphasic                                  |

|                | dysphasi*                               | developmental dysphasia<br>developmental receptive dysphasia<br>genetic dysphasia<br>dysphasic                               |
|----------------|-----------------------------------------|------------------------------------------------------------------------------------------------------------------------------|
|                | language disabilit*                     | language disability<br>language disabilities                                                                                 |
|                | language learning disabilit*            | language learning disability                                                                                                 |
|                | language and learning disabilit*        | language learning disabilities                                                                                               |
|                | language difficult*                     | language difficulty<br>language difficulties                                                                                 |
|                | language deficit*                       | specific language deficit<br>language deficits                                                                               |
|                | slow expressive language<br>development |                                                                                                                              |
|                | language outcome*                       | language outcomes                                                                                                            |
| Citation level | Filter terms                            | Filtered in                                                                                                                  |
| Abstract       | risk*                                   | risk factor<br>risk factors<br>prenatal risk<br>perinatal risk<br>neonatal risk                                              |
|                | famil*                                  | family history<br>familial aggregation<br>familial transmission<br>large families                                            |
|                | maternal                                | maternal mental health<br>maternal depression<br>maternal vocabulary<br>maternal age<br>maternal alcohol<br>maternal smoking |
|                | paternal                                | paternal alcohol<br>paternal smoking                                                                                         |
|                | parent*                                 | parenting behavior                                                                                                           |
|                | *economic                               | socioeconomic status                                                                                                         |
|                | background                              | non-English speaking background                                                                                              |

|               |                                |
|---------------|--------------------------------|
|               | racial background              |
|               | ethnic background              |
| education     | maternal education             |
|               | paternal education             |
|               | parental education             |
|               | mother's education             |
|               | father's education             |
|               | parent education               |
| complication* | obstetric complications        |
|               | pregnancy complications        |
|               | complications of pregnancy     |
| birth         | birth weight                   |
|               | birth order                    |
|               | multiple birth                 |
| prenatal      | prenatal care                  |
| perinatal     | perinatal event                |
| neonatal      | neonatal condition             |
| pregnancy     | pregnancy condition            |
| exposure*     | chemical exposure              |
|               | exposure to multiple languages |
| prematur*     | premature                      |
|               | prematurity                    |
| gender        |                                |
| sex           |                                |

---
